# Supplementary material
Source: publisher figshare collection journal article supplement (https://karger.figshare.com/articles/dataset/_/4005012)

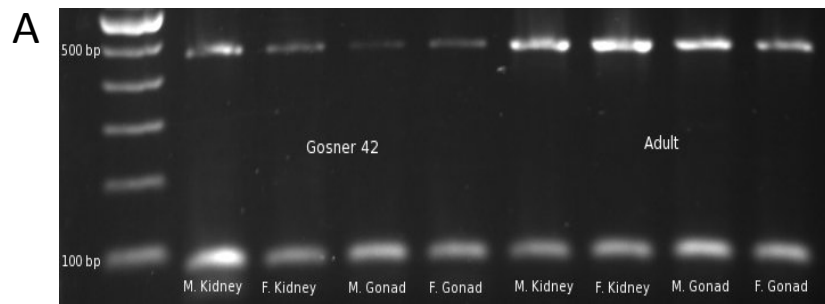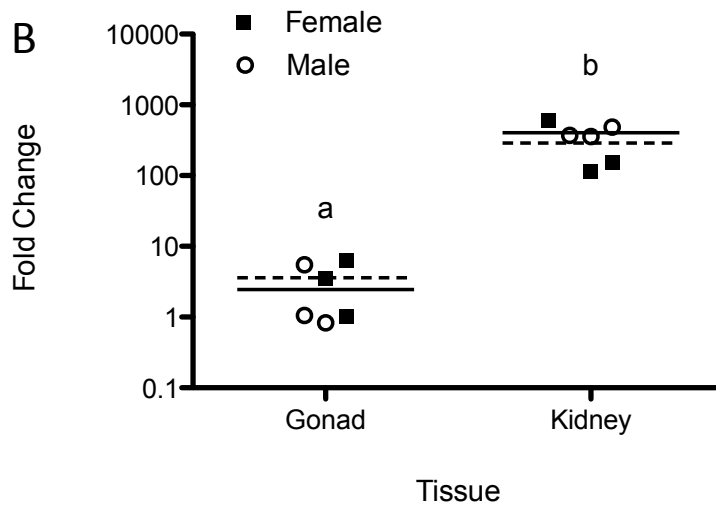

Robertson et al., Supplementary Figure 1

Supplement: Supplementary file 1 [file 1]
